# Supplementary material for: Formation mechanism and optical characterization of polymorphic silicon nanostructures by DC arc-discharge
Source: Royal Society of Chemistry journal article supplement (doi:10.1039/c5ra11738k), 2015-01-01
Supplement: c5ra11738k1.pdf [file c5ra11738k1.pdf]

## Supporting Information

### Formation Mechanism and Optical Characterization of Polymorphic Silicon Nanostructures by DC Arc-discharge

Jieyi Yu, Jian Gao, Fanghong Xue, Xiuhong Yu, Hongtao Yu, Xinglong Dong,\* Hao Huang, Ang Ding, Xie Quan and Guozhong Cao

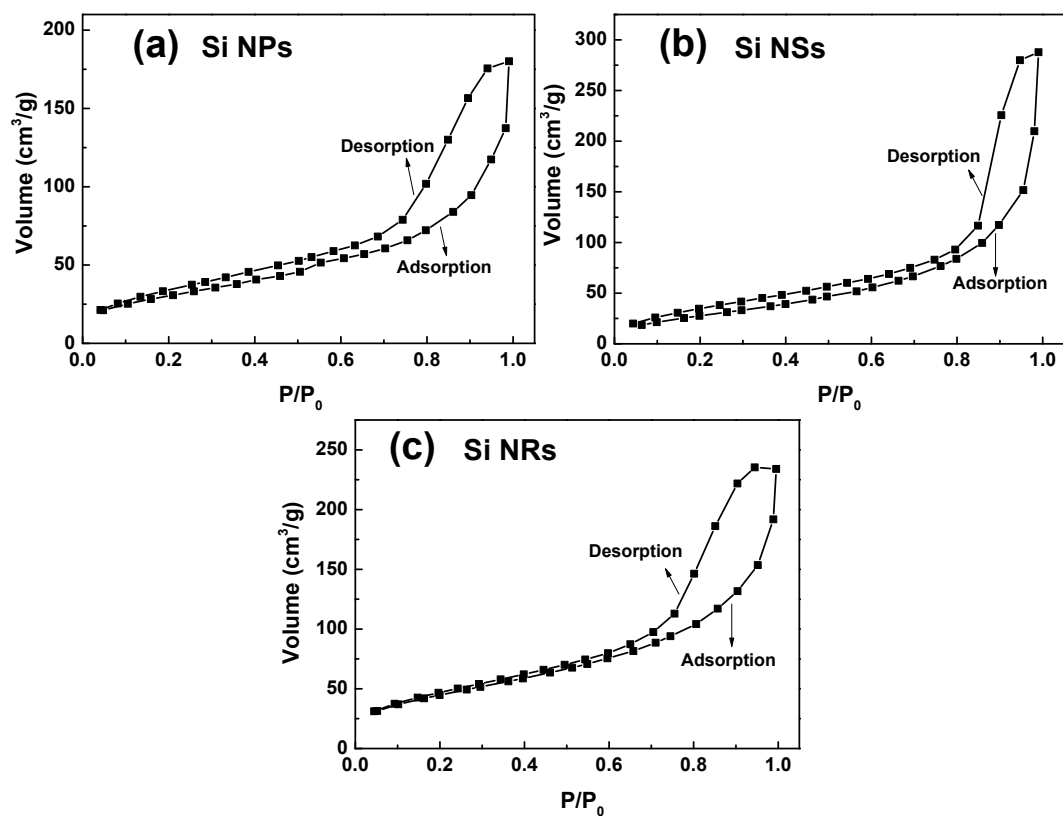

Fig. S1. Nitrogen adsorption-desorption isotherms of (a) Si NPs, (b) Si NSs, (c) Si NRs under 77.3 K.
